# Supplementary material for: Identification and characterization of a HEPN-MNT family type II toxin–antitoxin in Shewanella oneidensis
Source: PubMed Central journal article supplement (PMC4621449; doi:10.1111/1751-7915.12294), 2015-06-25
Supplement: mbt20008-0961-sd1.pdf [file mbt20008-0961-sd1.pdf]

---

## SUPPLEMENTARY FILE

### Identification and Characterization of a HEPN-MNT Family Type II Toxin-Antitoxin in *Shewanella oneidensis*

Jianyun Yao<sup>1,2†</sup>, Yunxue Guo<sup>1†</sup>, Zhenshun Zeng<sup>1,2</sup>, Xiaoxiao Liu<sup>1</sup>, Fei Shi<sup>1</sup>, Xiaoxue Wang<sup>1\*</sup>

<sup>1</sup>Key Laboratory of Tropical Marine Bio-resources and Ecology, Guangdong Key Laboratory of Marine Materia Medica, RNAM Center for Marine Microbiology, South China Sea Institute of Oceanology, Chinese Academy of Sciences, Guangzhou 510301, PR China,

<sup>2</sup>University of Chinese Academy of Sciences, Beijing 100049, China

† These authors contributed equally to this work.

\*To whom correspondence should be addressed. Tel: +86 20 89267515; Fax: +86 20 89235490;  
Email: xxwang@scsio.ac.cn

**Keywords:** Toxin-antitoxin, MNT, HEPN, *Shewanella oneidensis*

**Running head:** a HEPN-MNT Family Type II TA in *S. oneidensis*

**Table S1.** Oligonucleotides used for plasmid construction gene knockout, site-directed mutagenesis (target mutated nucleotides are in red font) and DNA sequencing. Restriction enzyme sites are underlined. f indicates forward primer and r indicates reverse primer.

| Purpose/Name                        | Sequence (5'-3')                                          |
|-------------------------------------|-----------------------------------------------------------|
| <b>Plasmid construction</b>         |                                                           |
| pHEG-SO_3165-f                      | GGAATTCATGCAACAACAACTAAATGAAAATA                          |
| pHEG-SO_3165-r                      | CCCAAGCTTTCAAAGTGACTCCCCCCTATGAG                          |
| pHEG-SO_3166-f                      | GGAATTCATGACATTATTATCAATAAAATA                            |
| pHEG-SO_3166-r                      | CCCAAGCTTTCACTCTGCTTTTATCACATCAA                          |
| pCA24N-SO_3165-f                    | GCCCAACAACAACTAAATGAAAATAA                                |
| pCA24N-SO_3165-r                    | CCAAGTGACTCCCCCCTATGAGC                                   |
| pCA24N-SO_3166-f                    | GCCAATGACATTATTATCAATAA                                   |
| pCA24N-SO_3166-r                    | CCCTCTGCTTTTATCACATCAAT                                   |
| pET28b-SO_3165-f                    | CTAGCCATGGGCATGCAACAACAACTAAATGAAAATAA                    |
| pET28b-SO_3165-r                    | CCCAAGCTTCTAGTGGTGGTGGTGGTGGTGAAGTGACTCCCCCCTATGAGCTTTGGC |
| pET28b-SO_3166-f                    | CTAGCCATGGGCATGAATGACATTATTATCAATAA                       |
| pET28b-SO_3166-r                    | CCCAAGCTTCTAGTGGTGGTGGTGGTGGTGGTCTGCTTTTATCACATCAATAAATTG |
| pBS(Kan)-SO_3165-500 up-f           | GTCTAGGGTACCAGTACCGCGGTATATTGAGCG                         |
| pBS(Kan)-SO_3166-r                  | GAGCACGAGCTCTCACTCTGCTTTTATCACATCA                        |
| FAM-SO_3166-r                       | CGAGAGTGGCTGAGTAATAA                                      |
| pHGR03-P <sub>so_3165-3166</sub> -f | CCGGAATTC TGCCTACGAGGCCAGAATTTAAA                         |
| pHGR03-P <sub>so_3165-3166</sub> -r | CGCGGATCCGTAATCATGGTCATAGGTCCATTGCACGATTTGA               |
| <b>PCR and DNA sequencing</b>       |                                                           |
| pCA24N-f                            | GATAACAATTTACACAGAATT                                     |
| pCA24N-r                            | GTCAGAGGTTTTACCGTCATCA                                    |

---

|                                       |                                                    |
|---------------------------------------|----------------------------------------------------|
| PHEG-f                                | CACCTCGCTAACGGATTCACC                              |
| PHEG-r                                | CCAATACGCAAACCGCCTC                                |
| pET28b-f                              | TAATACGACTCACTATAGGG                               |
| pET28b-r                              | TATGCTAGTTATTGCTCAG                                |
| pBS(kan)-f                            | GCCTTTGAGTGAGCTGATACCGCTC                          |
| pBS(kan)-r                            | GTGATGGTTCACGTAGTGGGCCATCG                         |
| CRSID-F                               | GATGTTGAAGTGGCGAGC                                 |
| CRSID-V                               | ATGGATGCAAGCAAATGC                                 |
| PSO_3165-f                            | TACGAGGCCAGAATTTAAAA                               |
| PSO_3165-r                            | AGGTCCATTGCACGATTTGA                               |
| <b>Gene knockout</b>                  |                                                    |
| delta SO_3166-5-O                     | GGGGACAAGTTTGTACAAAAAAGCAGGCTCGAACGCTCCGCTTACAGATA |
| delta SO_3166-5-I                     | GGTCCGGGTTTCGCTATCTATTTCAAAGTGACTCCCCCTATGAG       |
| delta SO_3166-3-O                     | GGGACCACTTTGTACAAGAAAGCTGGGTTATGCGAGCCATCCTGAATC   |
| delta SO_3166-3-I                     | ATAGATAGCGAACCCGGACCAGATGTTGACAGAACAAGAAACG        |
| delta SO_3165-3166-5-O                | GGGGACAAGTTTGTACAAAAAAGCAGGCTCGAACGCTCCGCTTACAGATA |
| delta SO_3165-3166-5-I                | GGTCCGGGTTTCGCTATCTATTAGGTCCATTGCACGATTTGATGAATA   |
| delta SO_3165-3166-3-O                | GGGACCACTTTGTACAAGAAAGCTGGGTTATGCGAGCCATCCTGAATC   |
| delta SO_3165-3166-3-I                | ATAGATAGCGAACCCGGACCAGATGTTGACAGAACAAGAAACG        |
| delta SO_3166-1-f                     | GACTGGGATAGTAACGGCTCAAA                            |
| delta SO_3166-s-f                     | ATCCGCTATCAAGAATGCGAATC                            |
| delta SO_3166-1-r                     | GCTTTGGTCCGTATGTTGATTGA                            |
| delta SO_3166-s-r                     | ACTTTAGGGCAAGCACAAACAGCG                           |
| <b>Single amino acid substitution</b> |                                                    |
| SO_3166 R97G-f                        | GAAAATGGTCGGCCTGGGAAACATCGCAGTACA                  |

---

|                 |                                                     |
|-----------------|-----------------------------------------------------|
| SO_3166 R97G-r  | TGTA <b>CT</b> GCGATGTTT <b>CC</b> CAGGCCGACCATTTTC |
| SO_3166 H102A-f | TTGAGTTCTTGGTAGTCA <b>GCT</b> ACTGCGATGTTTCGCAGGC   |
| SO_3166 H102A-r | GCCTGCGAAACATCGCAGTA <b>GCT</b> GACTACCAAGAACTCAA   |
| SO_3166 Y104A-f | TATCGAGGTTGAGTTCTTGG <b>GCG</b> TCATGTACTGCGATGTTTC |
| SO_3166 Y104A-r | GAAACATCGCAGTACATGAC <b>GCC</b> CAAGAACTCAACCTCGATA |

---

**Table S2.** Mass spectrometry results of the co-purified protein with SO\_3166-CHis. Peptide fragments observed were highlighted in different colors, and their loci in SO\_3165 protein were also shown.

| Reference Scan(s) | Peptide                                          | MH+        | z | P (pro)<br>P (pep) | Score<br>XC | Coverage<br>DeltaCn | MW<br>Sp | Accession<br>RSp | Peptide (Hits)<br>Ions | Count |
|-------------------|--------------------------------------------------|------------|---|--------------------|-------------|---------------------|----------|------------------|------------------------|-------|
| 5542              | K.TISM*YQHLQAER.Q                                | 1492.72129 | 2 | 2.56E-04           | 3.72        | 0.46                | 654.5    | 1                | 17/22                  | 2     |
| 5745              | R.QAIIDDVM*ANTAAK.A                              | 1476.73627 | 2 | 2.15E-03           | 3.19        | 0.54                | 507.0    | 1                | 20/26                  | 2     |
| 8253              | K.QLWGTQQDDELFAVK.T                              | 1777.87554 | 2 | 4.56E-06           | 4.73        | 0.66                | 1445.2   | 1                | 21/28                  | 2     |
| 8447              | R.NSDIDIAVLAADTLDNIAR.W<br>K.LASALDSVDLVDLRSASTV | 2000.02947 | 2 | 2.29E-04           | 2.81        | 0.54                | 451.9    | 1                | 16/36                  | 2     |
| 9743              | LCQQVVTQGK.Q<br>K.LLRDNIPKLQLIYLFSGYSQ           | 3188.64677 | 3 | 1.55E-10           | 6.77        | 0.73                | 1913.4   | 1                | 40/116                 | 2     |
| 9932              | TQHR.N                                           | 2960.61049 | 3 | 2.22E-15           | 6.72        | 0.68                | 2843.9   | 1                | 43/96                  | 2     |

toxin-antitoxin system antidote Mnt family (SO\_3165) [*Shewanella oneidensis*]

SO\_3165: M<sup>1</sup>Q<sup>10</sup>Q<sup>20</sup>L<sup>30</sup>N<sup>40</sup>E<sup>50</sup>N<sup>60</sup>K<sup>60</sup>I<sup>60</sup> KLLRDNI PKLQLIYLFSGYSQGTQHRNSDIDIAVLAADTLDNIARWELAQ

Identified: KLLRDNI PKLQLIYLFSGYSQGTQHRNSDIDIAVLAADTLDNIARW

SO\_3165: K<sup>61</sup>L<sup>70</sup>A<sup>80</sup>S<sup>90</sup>A<sup>100</sup>L<sup>110</sup>S<sup>117</sup>D<sup>117</sup>V<sup>117</sup>D<sup>117</sup>L<sup>117</sup>V<sup>117</sup>D<sup>117</sup>L<sup>117</sup>R<sup>117</sup>S<sup>117</sup>A<sup>117</sup>S<sup>117</sup>T<sup>117</sup>V<sup>117</sup>L<sup>117</sup>C<sup>117</sup>Q<sup>117</sup>Q<sup>117</sup>V<sup>117</sup>V<sup>117</sup>T<sup>117</sup>Q<sup>117</sup>G<sup>117</sup>K<sup>117</sup> L<sup>117</sup>W<sup>117</sup>G<sup>117</sup>T<sup>117</sup>Q<sup>117</sup>Q<sup>117</sup>D<sup>117</sup>D<sup>117</sup>E<sup>117</sup>L<sup>117</sup>F<sup>117</sup>A<sup>117</sup>V<sup>117</sup>K<sup>117</sup>T<sup>117</sup>I<sup>117</sup>S<sup>117</sup>M<sup>117</sup>Y<sup>117</sup>Q<sup>117</sup>H<sup>117</sup>L<sup>117</sup>Q<sup>117</sup>A<sup>117</sup>E<sup>117</sup>

Identified: KLASALDSVDLVDLRSASTVLCQQVVTQGKQLWGTQQDDELFAVKTISMYQHLQAE

SO\_3165: R<sup>118</sup>Q<sup>128</sup>A<sup>139</sup>I<sup>139</sup>IDDVMANTAAKAHRGESL

Identified: RQAIIDDVMANTAACA

**Figure S1. Gene organization of *SO\_3165* and *SO\_3166* in *S. oneidensis*.** Transcriptional start site C (-30 bp upstream of the start codon of *SO\_3165*) for the operon is indicated with an arrow. The sequence encoding *SO\_3165* is shown in orange letters and the sequence encoding *SO\_3166* is shown in blue letters. The start and stop codons for *SO\_3166* and *SO\_3165* are highlighted in green and square frames, respectively. The primer used for primer extension experiment is underlined.

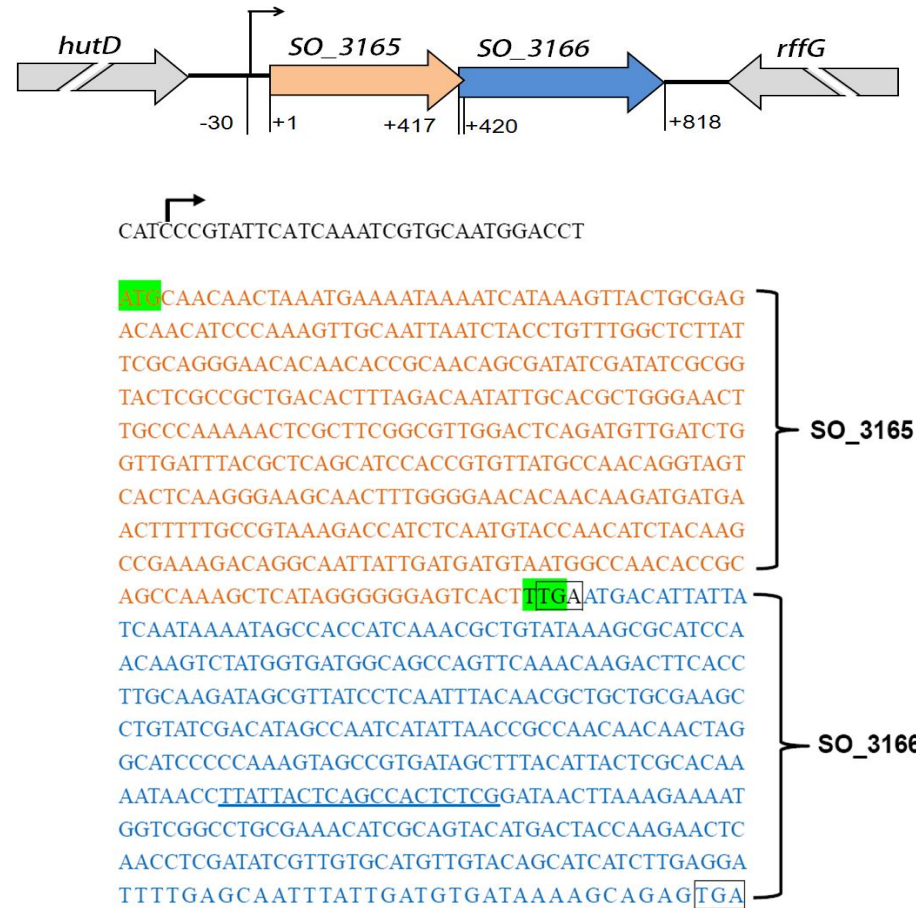

**Figure S2. Cell morphology examined by phase-contrast microscopy.** Morphology of cells overproducing SO\_3166 (MR-1/pHGE-SO\_3166) vs. cells carrying empty plasmid (MR-1/pHGE) at 0 h and 10 h. Red arrows point to the “swollen” cells. Cells were grown in LB until the OD reached ~0.1. A concentration of 1 mM IPTG was added to overexpress SO\_3166 in *S. oneidensis*. Two independent cultures were used for each strain; only representative images are shown here. Scale bars indicate 10  $\mu$ m.

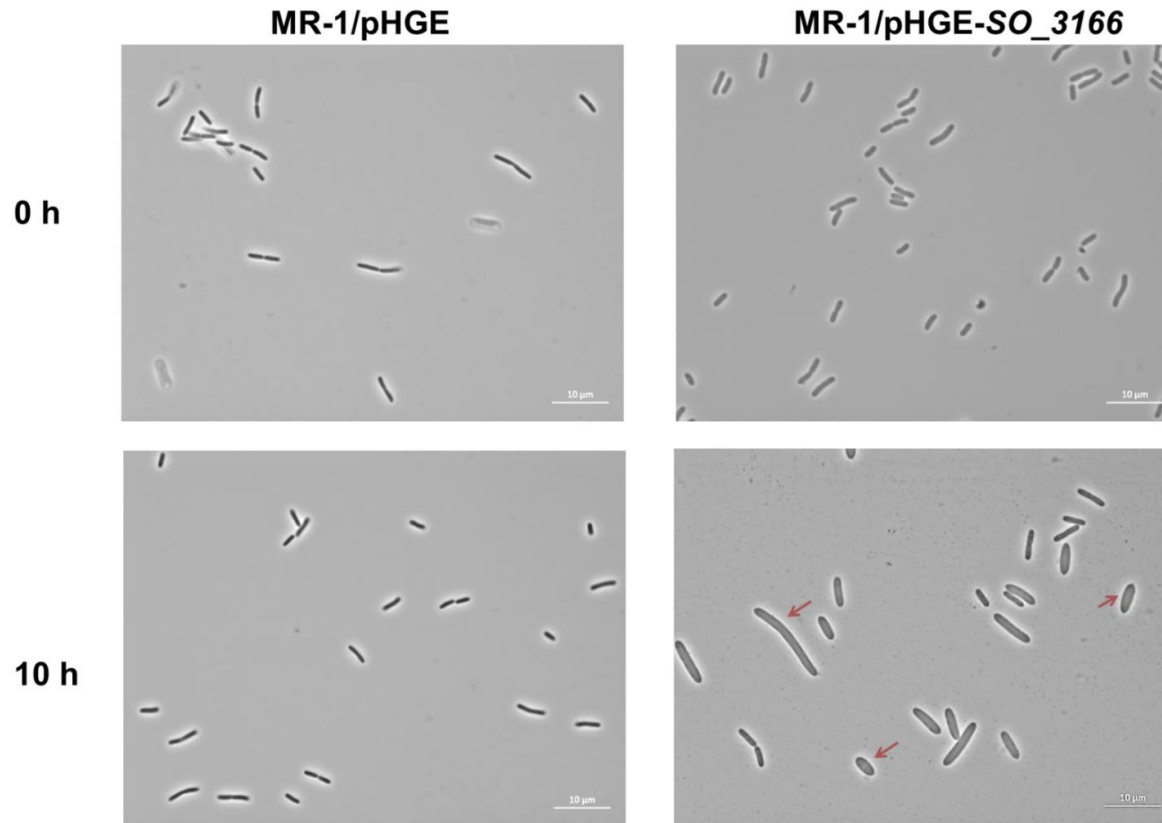

**Figure S3. SO\_3165 in *S. oneidensis* belongs to the MNT substrate-binding superfamily.** The secondary structure of SO\_3165 was predicted using the online PHYRE2 server (Kelley and Sternberg, 2009). The  $\alpha$ -helices and  $\beta$ -sheets are shown. SO\_3165 was predicted to have a similar secondary structure with the known secondary structure of nucleotidyltransferase 2 (np\_343093.1) from *Sulfolobus solfataricus*. The MNT residues in the two proteins are boxed.

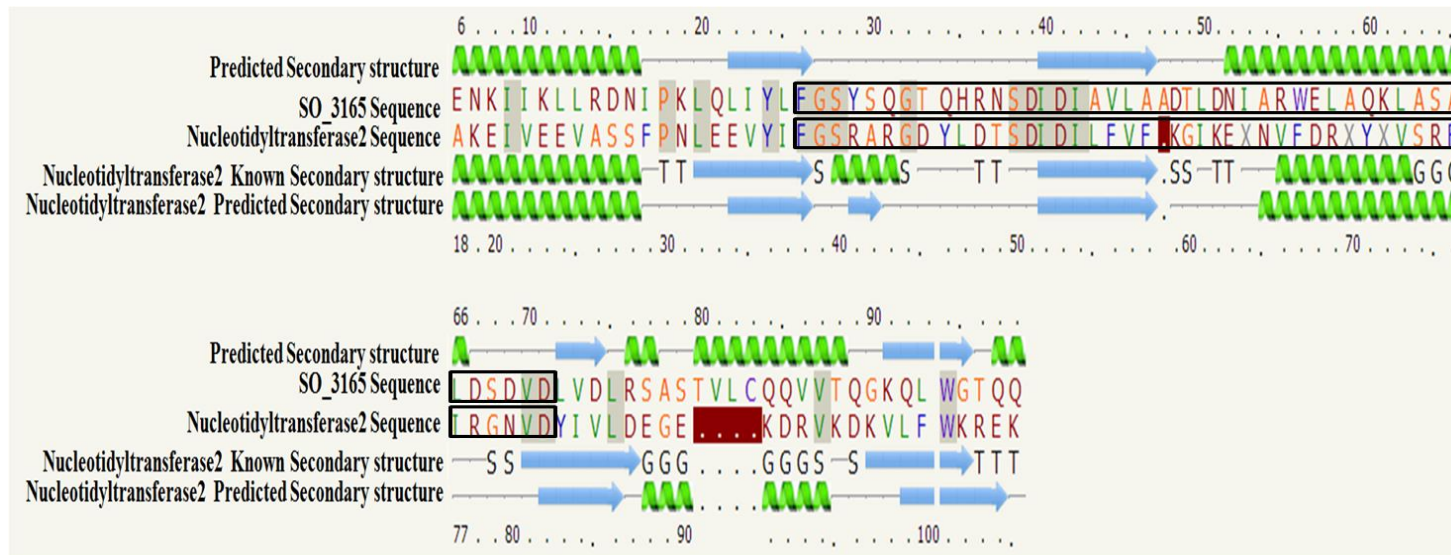



**Figure S4. SO\_3166 in *S. oneidensis* belongs to the HEPN superfamily.** The secondary structure of SO\_3166 was predicted using the online PHYRE2 server (Kelley and Sternberg, 2009). The  $\alpha$ -helices and  $\beta$ -sheets are shown. The toxin SO\_3166 has a similar secondary structure with the known secondary structure of the functional unknown HEPN family protein Yute 2 from *Bacillus Subtilis*. The HEPN residues in the two proteins are boxed, and conserved Rx4-6H motifs in the two proteins are also shown.

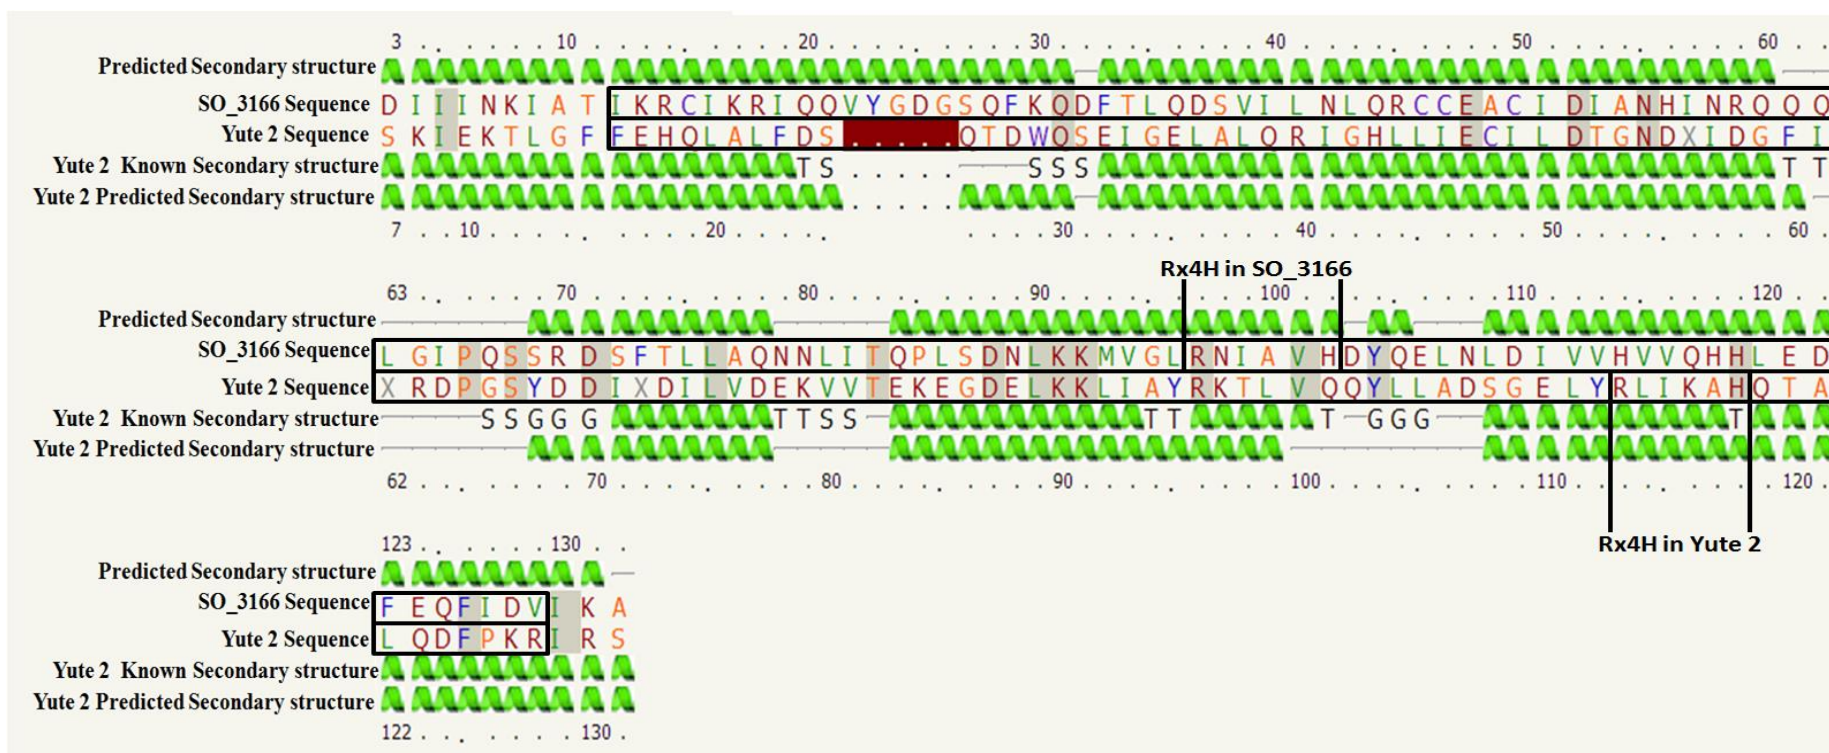

**Reference:**

Kelley, L.A., and Sternberg, M.J. (2009) Protein structure prediction on the Web: a case study using the Phyre server. *Nat Protoc* **4**: 363-371.
